# Supplementary material for: The Effectiveness of Different Concepts of Bracing in Adolescent Idiopathic Scoliosis (AIS): A Systematic Review and Meta-Analysis
Source: MDPI journal article supplement (doi:10.3390/jcm10102145), 2021-05-15
Supplement: s1 [file s1]

# SUPPLEMENTARY MATERIALS

## META-ANALYSIS PAPERS

| <i>FIRST<br/>AUTHOR</i> | <i>YEAR</i> | <i>RISK<br/>OF<br/>BIAS</i> | <i>N. OF<br/>PATIENTS</i> | <i>COBB</i>              | <i>RISSE</i>         | <i>KIND OF<br/>BRACE</i> | <i>BRACE</i>     | <i>FOLLOW-<br/>UP</i>     | <i>SUCCESS/FAILURE<br/>RATE</i> | <i>PERCENTAGE</i> |
|-------------------------|-------------|-----------------------------|---------------------------|--------------------------|----------------------|--------------------------|------------------|---------------------------|---------------------------------|-------------------|
| <i>XU</i>               | 2019        | 14<br>24                    | 90                        | 40-45                    | 0-3                  | RIGID<br>FULL<br>TIME    | BOSTON           | 1.3 Y                     | ≤5°                             | 51,10%            |
| <i>GRIVAS</i>           | 2003        | 7 16                        | 28                        | 20-39                    | MENARCHE             | RIGID<br>FULL<br>TIME    | MODIFIED BOSTON  |                           | ≤5°                             | 82%               |
| <i>SAPETA</i>           | 2010        | 7 16                        | 79                        | 20-45                    | 0-4                  | RIGID<br>FULL<br>TIME    | CHENEAU          | 1-<br>5YEARS              | ≤5°                             | 48%               |
| <i>MAUYAMA</i>          | 2015        | 9 16                        | 33                        | 25-40                    | 0-2/>1 Y<br>POST-MEN | RIGID<br>FULL<br>TIME    | RIGO-<br>CHENEAU | MEAN 2,8                  | ≤5°                             | 76%               |
| <i>AULISA</i>           | 2020        | 12<br>16                    | 163                       | 20-60<br>(MEAN<br>28,98) | 0-4                  | RIGID<br>FULL<br>TIME    | PASB             | AT<br>LEAST 10<br>Y       | ≤5°                             | 65,60%            |
| <i>WEISS</i>            | 2017        | 9 16                        | 25                        | ≥40                      | 0-2                  | RIGID<br>FULL<br>TIME    | GENISINGEN       | 1,5 Y                     | ≤5°                             | 92%               |
| <i>LAUTEUR</i>          | 2017        | 10<br>16                    | 142                       | 10 25                    | 0-3                  | RIGID<br>NIGHT<br>TIME   | NOT STATED       | 3,75 Y                    | ≤5°                             | 83%               |
| <i>PRICE</i>            | 1990        | 7 16                        | 139                       | 25-49                    | 0-2                  | RIGID<br>NIGHT<br>TIME   | CHARLESTON       | >1 Y                      | ≤5°                             | 83%               |
| <i>LEE</i>              | 2012        | 9 16                        | 95                        | 25-40                    | 0-2/>1 Y<br>POST-MEN | RIGID<br>NIGHT<br>TIME   | CHARLESTON       | >2 Y<br>AFTER<br>BRACE    | ≤5°                             | 84,20%            |
| <i>ORTH-<br/>NISSEN</i> | 2016        | 7 16                        | 63                        | 25-40                    | 0-2/>1 Y<br>POST-MEN | RIGID<br>NIGHT<br>TIME   | PROVIDENCE       | MIN 2 Y                   | ≤5°                             | 57%               |
| <i>D'AMATO</i>          | 2001        | 8 16                        | 102                       | 20-42                    | 0-2                  | RIGID<br>NIGHT<br>TIME   | PROVIDENCE       | MIN 2 Y<br>AFTER<br>BRACE | ≤5°                             | 74%               |
| <i>SIMONY</i>           | 2019        | 10<br>16                    | 80                        | 20-45                    | >1 Y POST-<br>MEN    | RIGID<br>NIGHT<br>TIME   | PROVIDENCE       | 1 Y<br>AFTER<br>STOP      | ≤5°                             | 89%               |
| <i>COILLARD</i>         | 2007        | 8 16                        | 170                       | 25-40                    | 0-2                  | SOFT<br>FULL<br>TIME     | SPINECOR         | 2 AFTER<br>STOP           | ≤5°                             | 59,40%            |
| <i>COILLARD</i>         | 2014        | 16<br>24                    | 26                        | 15-30                    | 0-2                  | SOFT<br>FULL<br>TIME     | SPINECOR         | 5 Y                       | ≤5°                             | 73%               |
|                         |             |                             | 21                        |                          |                      | CONTROL                  |                  |                           |                                 | 52,70%            |
| <i>YRJONEN</i>          | 2006        | 12<br>24                    | 36                        | >25                      | 0-3                  | RIGID<br>NIGHT<br>TIME   | PROVIDENCE       | 1,8 Y                     | ≤5°                             | 72%               |
|                         |             |                             | 36                        | >25                      |                      | RIGID<br>FULL<br>TIME    | BOSTON           |                           |                                 | 78%               |
| <i>GUO</i>              | 2014        | 13<br>24                    | 18                        | 20-30                    | 0-2/>1 Y<br>POST-MEN | RIGID<br>FULL<br>TIME    | NOT STATED       | 2 AFTER<br>STOP           | ≤5°                             | 94,60%            |
|                         |             |                             | 20                        |                          |                      | SOFT<br>FULL<br>TIME     | SPINECOR         |                           |                                 | 65%               |

## BUBBLE GRAPH ANALYSIS

| AUTHOR                  | MINORS | SUCCESS | PT  |
|-------------------------|--------|---------|-----|
| XU ET AL 2019           | 8      | 51,10%  | 90  |
| GRIVAS ET AL. 2003      | 7      | 82%     | 28  |
| MARUYAMA ET AL.<br>2015 | 9      | 76%     | 33  |
| SAPETA ET AL. 2010      | 7      | 48%     | 79  |
| WEISS ET AL. 2017       | 9      | 92%     | 25  |
| AULISA ET AL. 2020      | 12     | 65,60%  | 163 |
| LAUTEUR EY AL. 2017     | 10     | 83%     | 142 |
| PRICE ET AL. 1990       | 7      | 83%     | 139 |
| LEE ET AL. 2012         | 9      | 84,20%  | 95  |
| D'AMATO ET AL. 2001     | 8      | 74%     | 102 |
| NISSSEN ET AL. 2016     | 7      | 57%     | 63  |
| SIMONY ET AL. 2019      | 10     | 89%     | 80  |
| COILLARD ET AL. 2007    | 8      | 58,40%  | 170 |

# SKELETAL MATURITY ASSESSMENT

## Papers included

| PAPER                 | N° PT | RISER | SUCCESS |
|-----------------------|-------|-------|---------|
| XU ET AL.             | 64    | 0-1   | 42,00%  |
| XU ET AL.*            | 38    | 0-2   | 48%     |
| MARUYAMA ET AL        | 33    | 0-2   | 76%     |
| WEISS ET AL.          | 25    | 0-2   | 92%     |
| PRICE ET AL.          | 139   | 0-2   | 83%     |
| LEE ET AL.            | 95    | 0-2   | 84,00%  |
| ORTH-NISSEN ET AL.    | 63    | 0-2   | 57%     |
| D'AMATO ET AL.        | 102   | 0-2   | 74%     |
| COILLARD ET AL.       | 170   | 0-2   | 58%     |
| COILLARD (2ND) ET AL. | 26    | 0-2   | 73%     |
| GUO ET AL.            | 18    | 0-2   | 95%     |
| GUO (S) ET AL.        | 20    | 0-2   | 65%     |
| XU ET AL.*            | 46    | 0-3   | 51%     |
| LAUTEUR ET AL.        | 142   | 0-3   | 83%     |
| YRJONEN (N) ET AL.    | 36    | 0-3   | 78%     |
| YRJONEN ET AL. *      | 36    | 0-3   | 72,00%  |
| SAPETA ET AL.         | 79    | 0-4   | 48,00%  |
| AULISA ET AL.         | 163   | 0-4   | 66%     |
